# Supplementary figures and images for: Quadrivalent HPV vaccine effectiveness against high‐grade cervical lesions by age at vaccination: A population‐based study
Source: PubMed Central journal article supplement — Int J Cancer. 2016 Mar 9;138(12):2867–74. doi: 10.1002/ijc.30035 (PMC5069657; doi:10.1002/ijc.30035), 2016-03-09

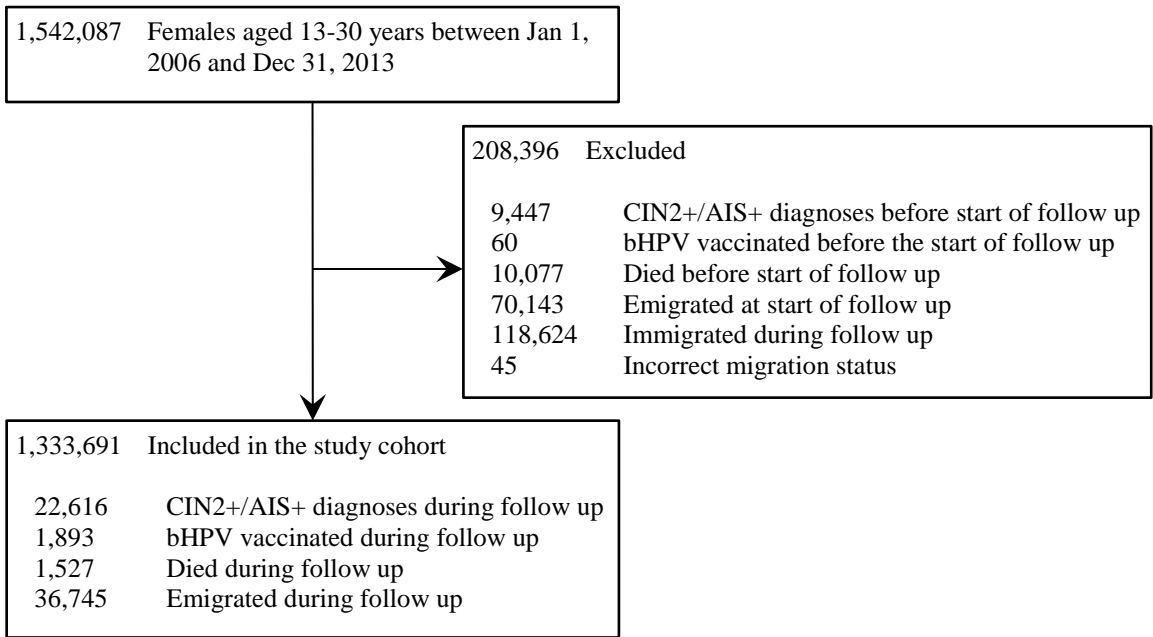

Supplement: IJC-138-2867-s001.pdf [file IJC-138-2867-s001.pdf]

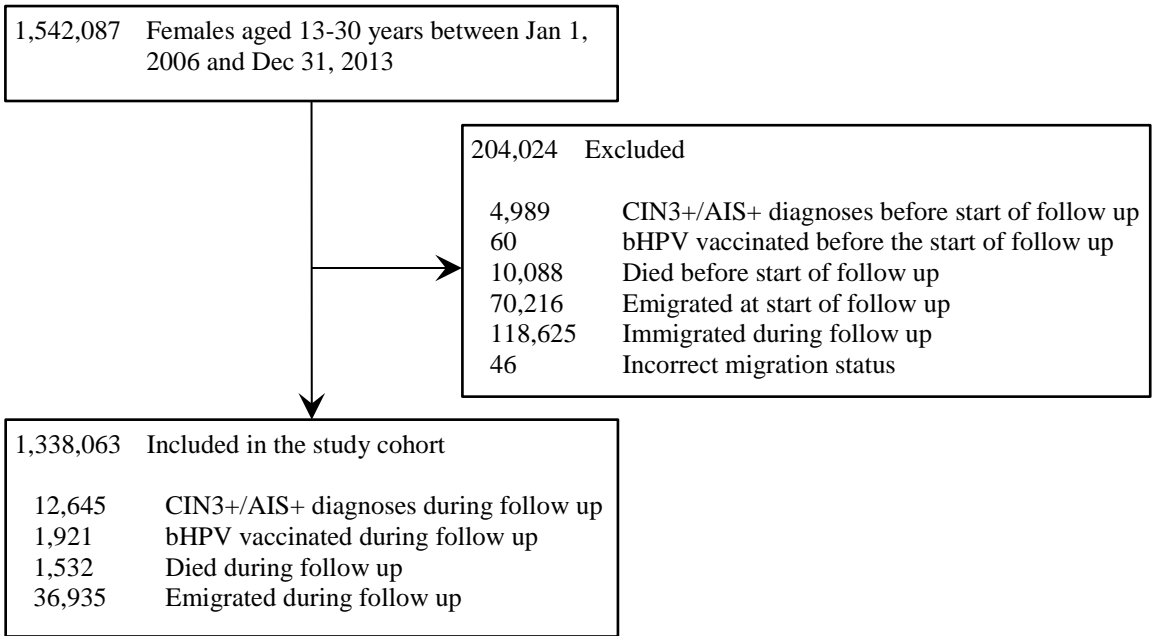

Supplement: IJC-138-2867-s002.pdf [file IJC-138-2867-s002.pdf]
